# Supplementary material for: Using Citizen Science and Field Survey to Document the Introduction, Establishment, and Rapid Spread of the Bare-eyed Pigeon, Patagioenas corensis, on the Island of Saint-Martin, West Indies
Source: Preprints.org preprint supplement (doi:10.20944/preprints202407.1049.v1), 2024-07-13
Supplement: Supplementary file 1 [file supplementary]

Supplementary materials

**Using Citizen Science and Field Survey to Document the Introduction, Establishment, and Rapid Spread of the Bare-eyed Pigeon, *Patagioenas* *corensis*, on the Island of Saint Martin, West Indies**

Christopher Cambrone 1,*, Anthony Levesque 2 and Frank Cézilly 1

1 Caribaea Initiative, Guadeloupe, French West Indies; [christopher.cambrone@caribaea.org](mailto:christopher.cambrone@caribaea.org) (C.C.); [frank.cezilly@caribaea.org](mailto:frank.cezilly@caribaea.org) (F.C.)

2 Association Amazona, Guadeloupe, French West Indies; [anthony.levesque@wanadoo.fr](mailto:anthony.levesque@wanadoo.fr)

***** Correspondence: [christopher.cambrone@caribaea.org](mailto:christopher.cambrone@caribaea.org)

**Table S1.** List of identification codes corresponding to ebird counts carried out by the authors. The date format is dd/mm/yyyy, and the time is in 24h format (hh:mm:ss).

| **Locality ID** | **Latitude** | **Longitude** | **Date** | **Time** | **Sampling event ID** |
| --- | --- | --- | --- | --- | --- |
| L25723664 | 18.0459499 | -63.0216681 | 05/07/2023 | 18:15:00 | S143838414 |
| L25723643 | 18.0499064 | -63.0338323 | 06/07/2023 | 05:41:00 | S143838413 |
| L25723714 | 18.0556528 | -63.0402689 | 06/07/2023 | 05:51:00 | S143838412 |
| L25723841 | 18.0732841 | -63.0319677 | 06/07/2023 | 06:02:00 | S143838453 |
| L25724009 | 18.0763895 | -63.0238526 | 06/07/2023 | 06:24:00 | S143838452 |
| L25724009 | 18.0763895 | -63.0238526 | 06/07/2023 | 06:35:00 | S143838451 |
| L25724185 | 18.0787281 | -63.0164993 | 06/07/2023 | 06:44:00 | S143838450 |
| L25724556 | 18.0835714 | -63.0223365 | 06/07/2023 | 06:56:00 | S143838449 |
| L25724637 | 18.0893879 | -63.0288152 | 06/07/2023 | 07:22:00 | S143838448 |
| L25724902 | 18.0911055 | -63.0263546 | 06/07/2023 | 07:43:00 | S143838446 |
| L25725148 | 18.0966390 | -63.0264066 | 06/07/2023 | 07:59:00 | S143838445 |
| L25734435 | 18.1147505 | -63.0208616 | 06/07/2023 | 08:23:00 | S143838438 |
| L25725991 | 18.1051245 | -63.0285992 | 06/07/2023 | 08:48:00 | S143838444 |
| L25726145 | 18.1081815 | -63.0407918 | 06/07/2023 | 09:06:00 | S143838443 |
| L25726792 | 18.0910259 | -63.0775585 | 06/07/2023 | 09:33:00 | S143838442 |
| L25727028 | 18.0891579 | -63.0737902 | 06/07/2023 | 09:51:00 | S143838441 |
| L25727658 | 18.0889095 | -63.0708782 | 06/07/2023 | 10:19:00 | S143838440 |
| L25735051 | 18.0930936 | -63.0745073 | 06/07/2023 | 10:35:00 | S143838433 |
| L25734424 | 18.0476997 | -63.0205607 | 06/07/2023 | 16:03:00 | S143838439 |
| L25734637 | 18.0543694 | -63.0190496 | 06/07/2023 | 16:16:00 | S143838436 |
| L25734792 | 18.0572312 | -63.0157972 | 06/07/2023 | 16:27:00 | S143838435 |
| L25735022 | 18.0623477 | -63.0152956 | 06/07/2023 | 16:36:00 | S143838434 |
| L25735314 | 18.0662208 | -63.0194248 | 06/07/2023 | 16:54:00 | S143838432 |
| L25735574 | 18.0698857 | -63.0282966 | 06/07/2023 | 17:03:00 | S143838431 |
| L25735998 | 18.0468467 | -63.0419101 | 06/07/2023 | 17:32:00 | S143838429 |
| L4265824 | 18.0265675 | -63.0416965 | 06/07/2023 | 17:54:00 | S143838426 |
| L25723664 | 18.0459499 | -63.0216681 | 07/07/2023 | 05:57:00 | S143838427 |
| L25743828 | 18.0458132 | -63.0344667 | 07/07/2023 | 06:12:00 | S143838428 |
| L25744383 | 18.0927459 | -63.0755544 | 07/07/2023 | 06:48:00 | S143838425 |
| L25726792 | 18.0910259 | -63.0775585 | 07/07/2023 | 07:15:00 | S143838424 |

**Continued Table S1..**

| **Locality ID** | **Latitude** | **Longitude** | **Date** | **Time** | **Sampling event ID** |
| --- | --- | --- | --- | --- | --- |
| L25744755 | 18.0847001 | -63.0762042 | 07/07/2023 | 07:30:00 | S143838423 |
| L3679728 | 18.0727875 | -63.1174475 | 07/07/2023 | 08:13:00 | S143838421 |
| L25745721 | 18.0645141 | -63.1324885 | 07/07/2023 | 08:39:00 | S143838420 |
| L25745926 | 18.0709369 | -63.1369625 | 07/07/2023 | 08:51:00 | S143838419 |
| L25746152 | 18.0650880 | -63.1493651 | 07/07/2023 | 09:04:00 | S143838418 |
| L25746425 | 18.0613245 | -63.1461555 | 07/07/2023 | 09:14:00 | S143838417 |
| L25752324 | 18.0636122 | -63.1319991 | 07/07/2023 | 09:44:00 | S143838416 |
| L25754105 | 18.0688766 | -63.0358688 | 07/07/2023 | 15:24:00 | S143838410 |
| L25723841 | 18.0732841 | -63.0319677 | 07/07/2023 | 15:27:00 | S143838411 |
| L25754598 | 18.0961207 | -63.0391003 | 07/07/2023 | 15:47:00 | S144014748 |
| L25754765 | 18.1040351 | -63.0523097 | 07/07/2023 | 15:55:00 | S143838408 |
| L25755013 | 18.1023772 | -63.0483496 | 07/07/2023 | 16:08:00 | S143838407 |
